# Supplementary material
Source: Elsevier journal article supplement (https://www.sciencedirect.com/science/article/pii/S0034935621002127)
Supplement: mmc1 [file S0034935621002127:mmc1.docx]

**MATERIAL SUPLEMENTARIO**

TABLA 1. Resumen de los estudios referidos a la utilización del sulfato de magnesio

| **Autor** | **Tipo de estudio/pacientes/dosis** | **Año** | **Principales hallazgos clínicos** |
| --- | --- | --- | --- |
| Muthiah T y col | RCT: 60 pacientes  150mg | 2016 | Alarga el tiempo hasta el primer rescate analgésico |
| Khairnar P y col | RCT: 54 pacientes | 2016 | No prolonga la analgesia postop con levob, si con ropiv |
| Beiranvand y col40 | RCT: 30 pacientes  300 mg | 2020 | Añadido a lidocaína produce mejor anestesia/analgesia postop sin efectos 2ª |
| Abd-Elsalam y col | RCT: 60 pacientes  200 mg | 2017 | Prolonga la duración bloqueo TAP sin efectos 2ª |
| Imani F y col42 | RCT: 60 pacientes  150 mg | 2018 | Añadido a ropiv en TAP no afecta a la analgesia |
| Jebali C y col41 | RCT: 24 pacientes  450 mg | 2018 | Añadido a lidocaína prolonga el bloqueo femoral |

TABLA 2. Resumen de los estudios referidos a la utilización de la buprenorfina

| **Autor** | **Tipo de estudio/pacientes/dosis** | **Año** | **Principales hallazgos clínicos** |
| --- | --- | --- | --- |
| Schnabel y col45 | Metaanálisis:13RCT,685 pacientes  0.1-0.3 mg | 2017 | Prolonga analgesia postoperatoria, pero aumenta NVPO |
| van Beek R y col46 | RCT: 82 pacientes  0.3 mg | 2017 | No prolonga el bloqueo femoral |
| Willian BA y col47 | comparativa | 2015 | Bloqueo sin daño sobre nervio |

Figura 1. Características de un complemento anestésico local ideal


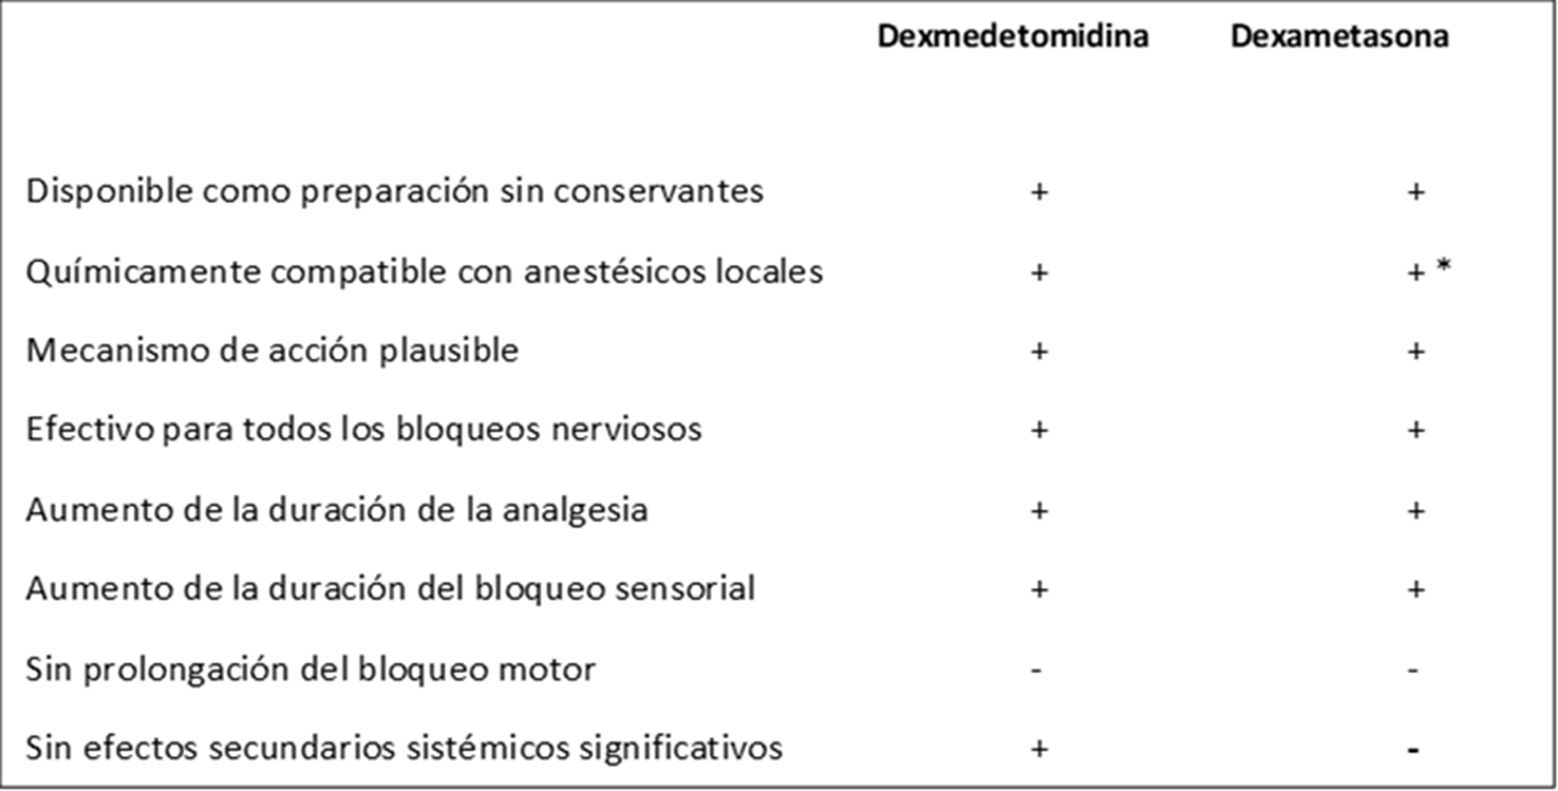


*dexametasona no es compatible in-vitro con ropivacaina
